# Supplementary material for: Cell cycle–dependent force transmission in cancer cells
Source: PubMed Central journal article supplement — Mol Biol Cell. 2018 Oct 15;29(21):2528–39. doi: 10.1091/mbc.E17-12-0726 (PMC6254576; doi:10.1091/mbc.e17-12-0726), 2018-10-15
Supplement: mbc-29-2528-s001.pdf [file mbc-29-2528-s001.pdf]

# Supplemental Materials

*Molecular Biology of the Cell*

Panagiotakopoulou et al.

## SUPPLEMENTARY INFORMATION

for

### Cell cycle-dependent force transmission in cancer cells

*Magdalini Panagiotakopoulou<sup>a</sup>, Tobias Lendenmann<sup>a</sup>, Francesca Michela Pramotton<sup>a</sup>, Costanza Giampietro<sup>a</sup>, Georgios Stefopoulos<sup>a</sup>, Dimos Poulikakos<sup>a, \*</sup>, and Aldo Ferrari<sup>a, \*</sup>.*

<sup>a</sup>Laboratory of Thermodynamics in Emerging Technologies, Department of Mechanical and Process Engineering, ETH Zurich, Sonneggstrasse 3, CH-8092, Zürich, Switzerland

\* correspondence to: [aferrari@ethz.ch](mailto:aferrari@ethz.ch); [dpoulikakos@ethz.ch](mailto:dpoulikakos@ethz.ch)

**A**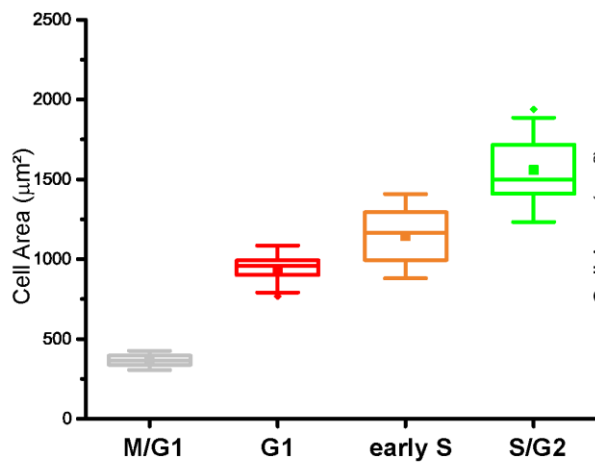**B**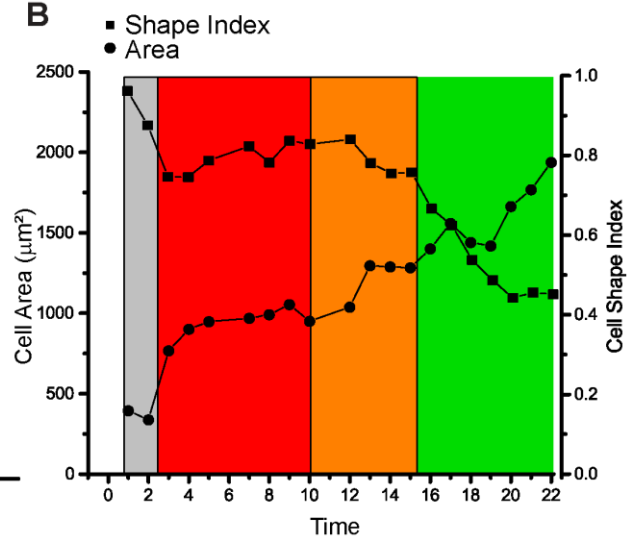**C**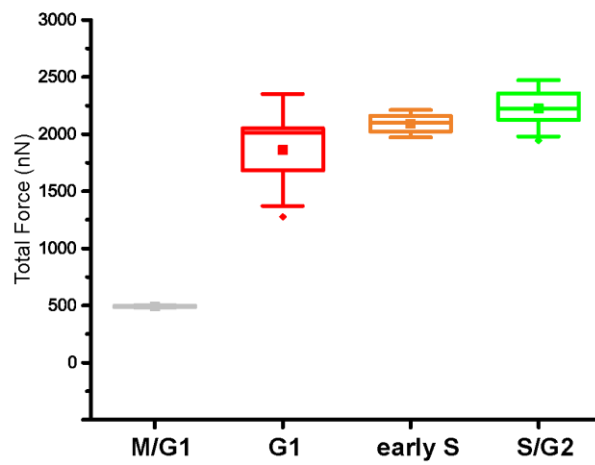**D**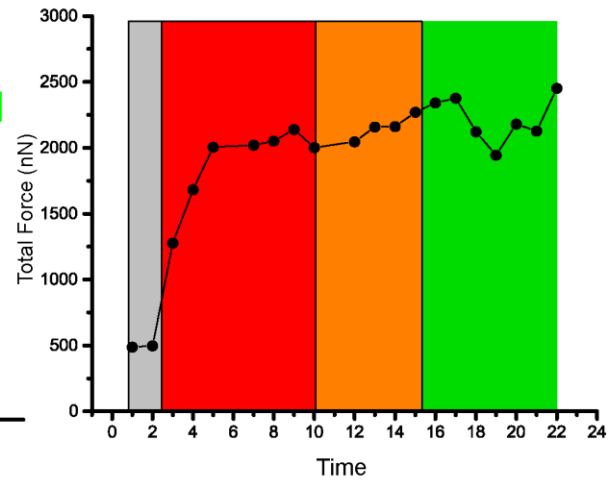**E**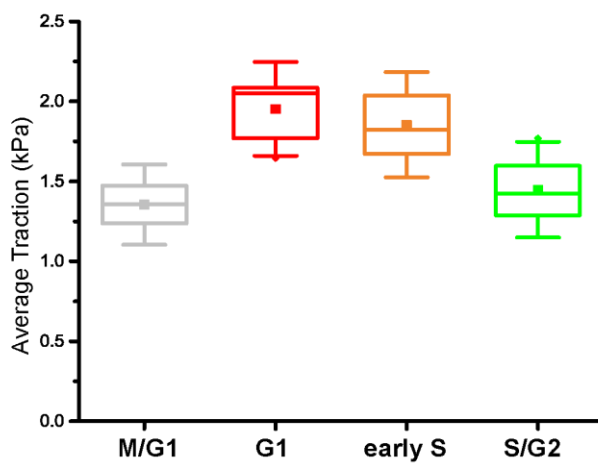**F**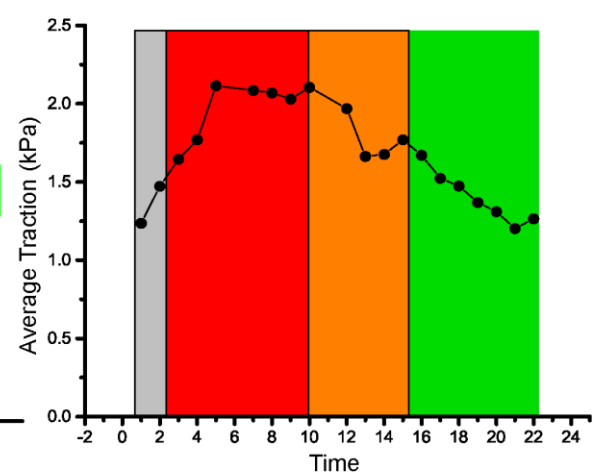

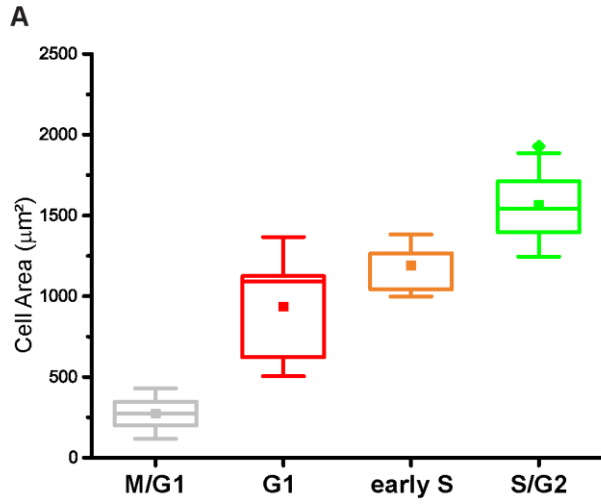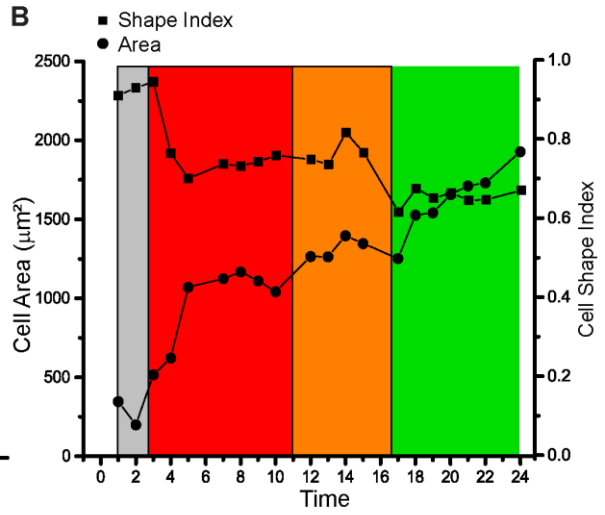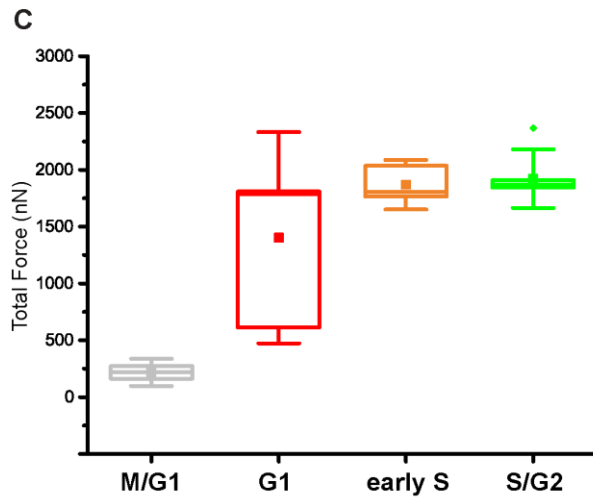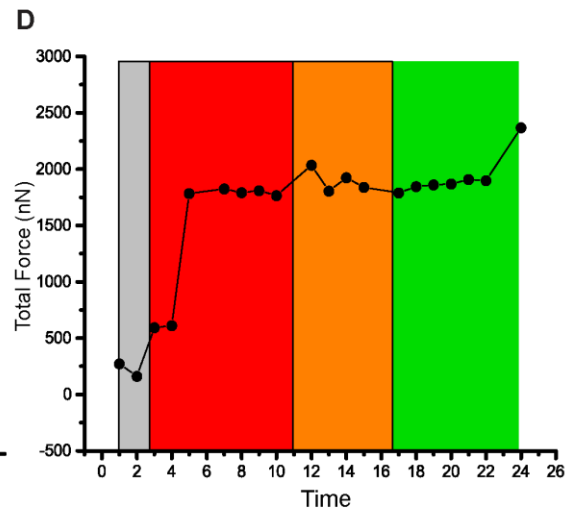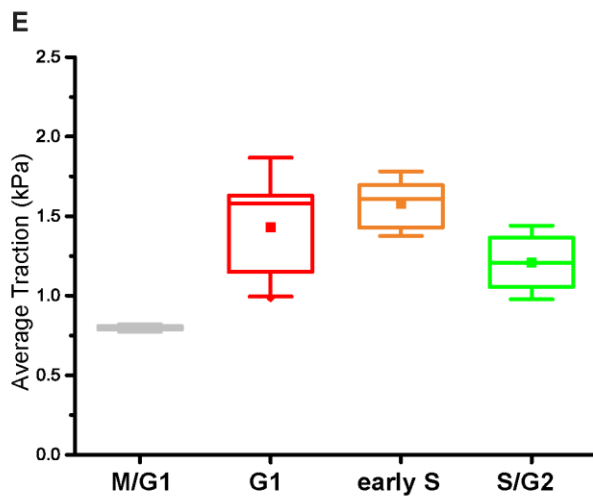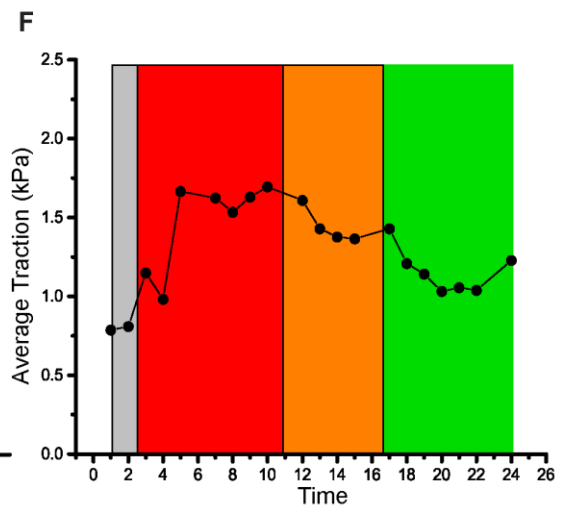

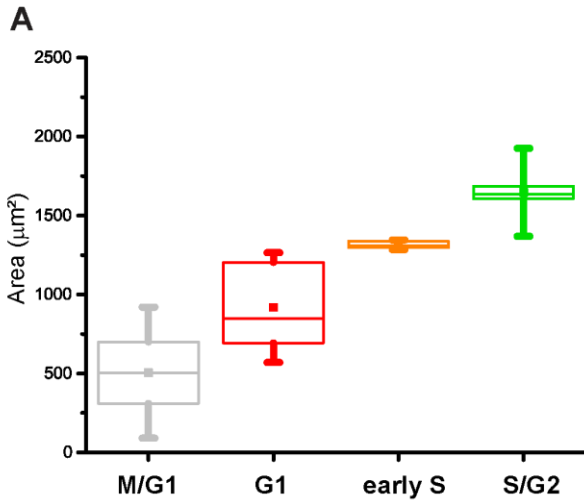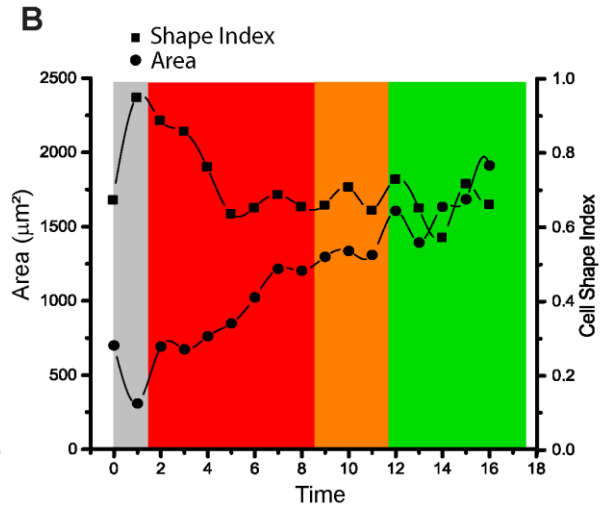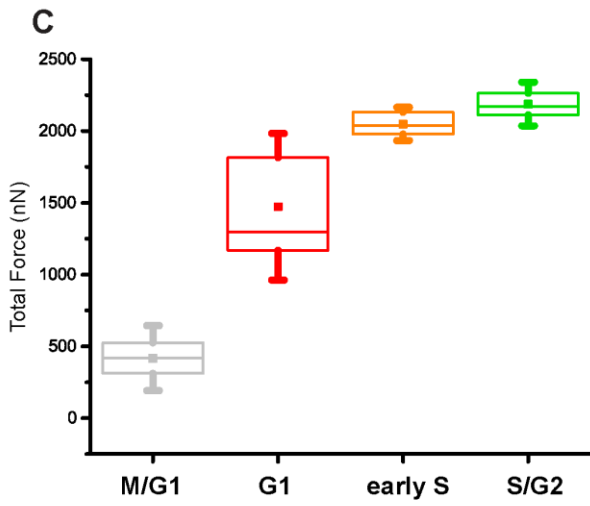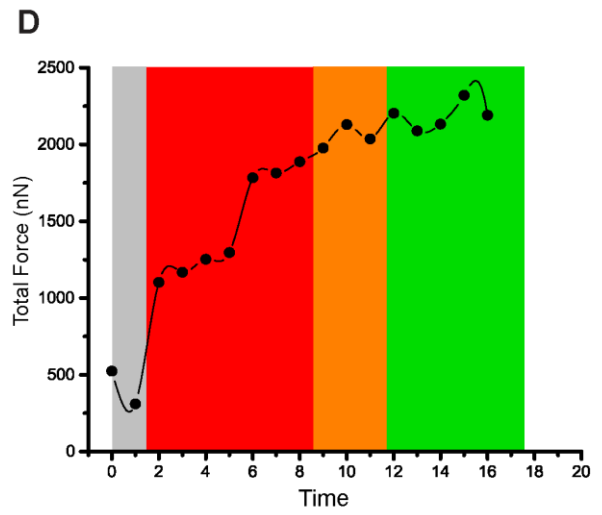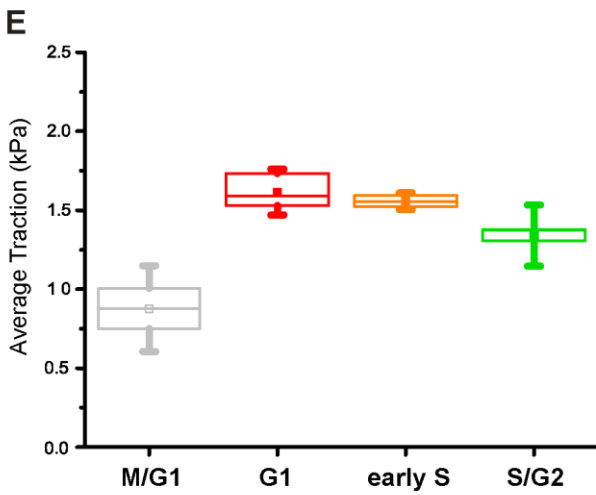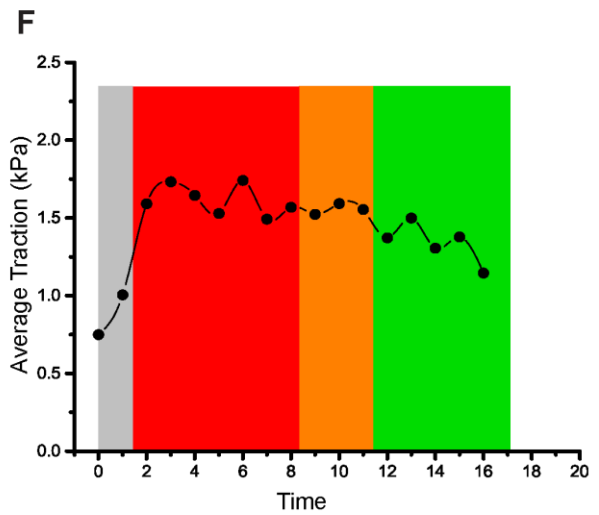

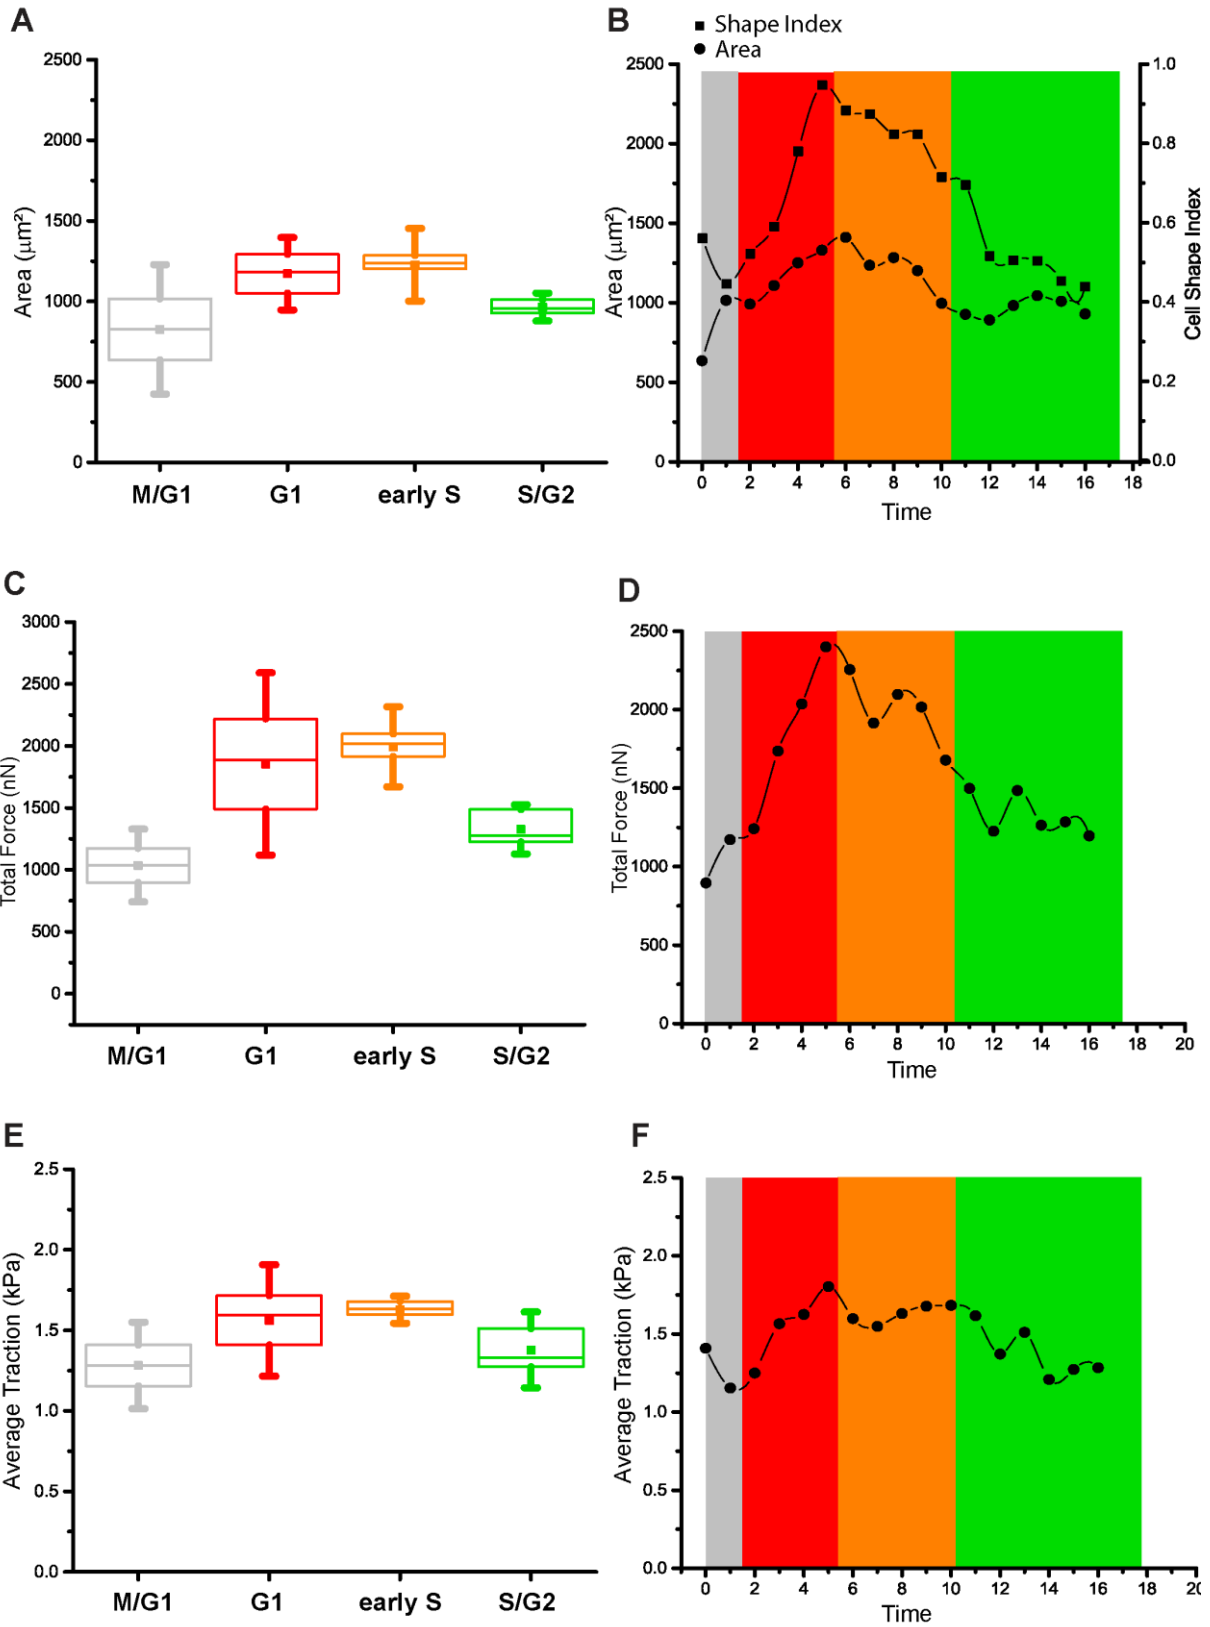

Figures S1-S4: Individual cell variability for cell area (A, B), forces (C, D) and tractions (E, F) for 4 distinct cells

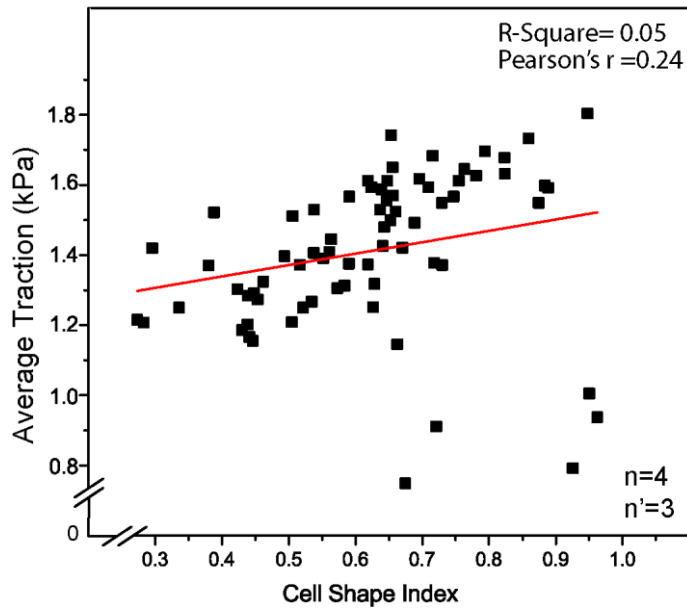

**Figure S5:** Correlation between cell shape and traction: The R-Square and Pearson's  $r$  values indicate that the two variables are not linearly correlated.  $n$  = number of cells and  $n'$  = number of independent experiments.

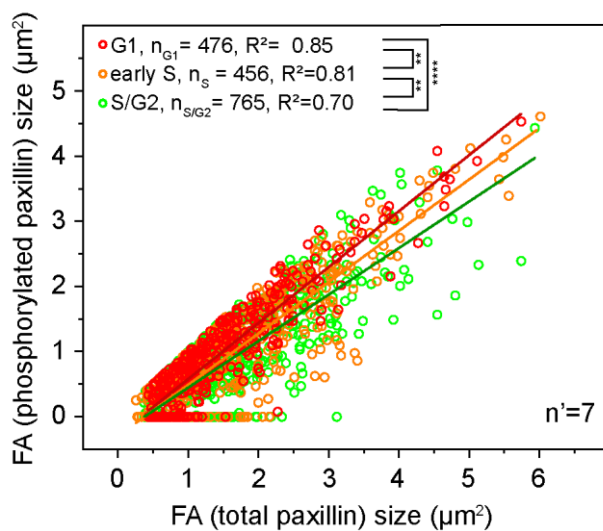

**Figure S6:** Correlation between the focal adhesion size (total paxillin) and the size of phosphorylated paxillin.  $**p < 0.01$ .  $****p < 0.0001$ .  $n$  = number of individual focal adhesions for 7 independent experiments.  $n$  = number of cells and  $n'$  = number of independent experiments.

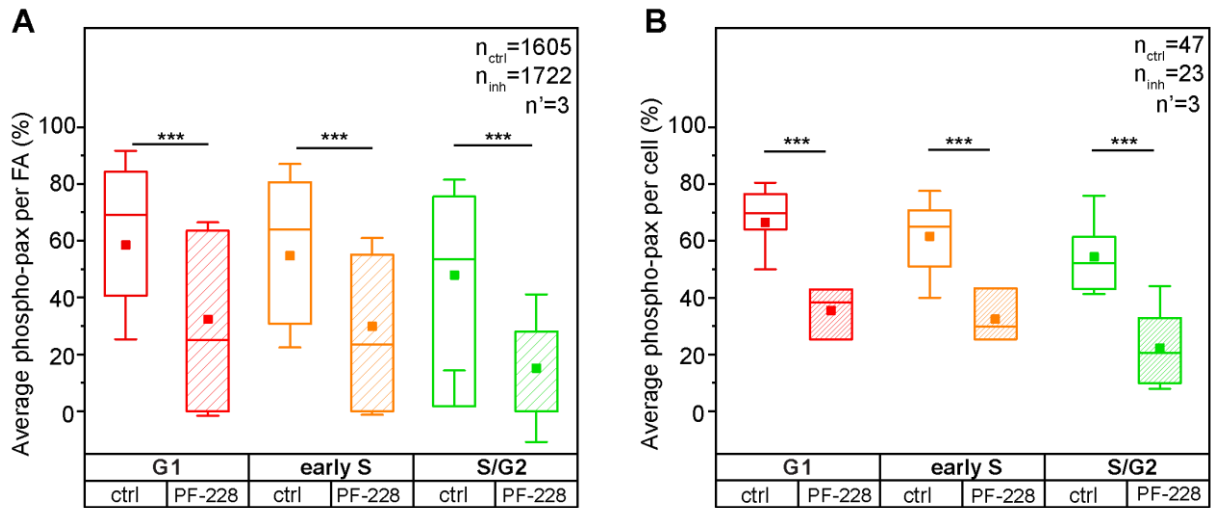

**Figure S7:** The effect of FAK inhibition on paxillin phosphorylation per focal adhesion **(A)** and per cell **(B)**  $***p<0.001$ . Panel A:  $n$ =number of individual focal adhesions, Panel B:  $n$ =number of cells and  $n'$  = number of independent experiments.

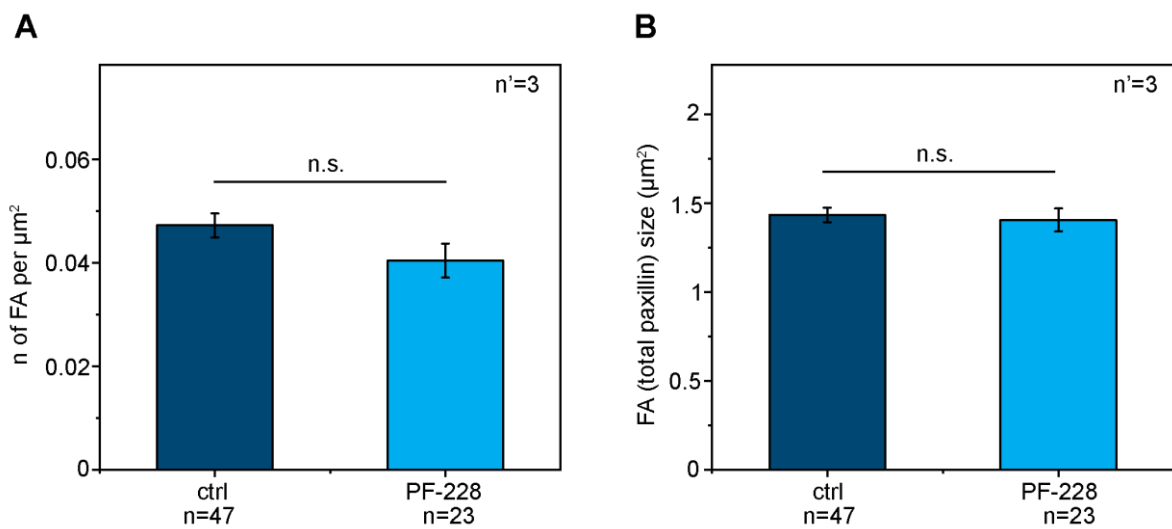

**Figure S8:** The effect of FAK inhibition on the number of focal adhesions per  $\mu m^2$  **(A)** , and the average size of focal adhesions **(B)**  $n$ = number of cells and  $n'$  = number of independent experiments.



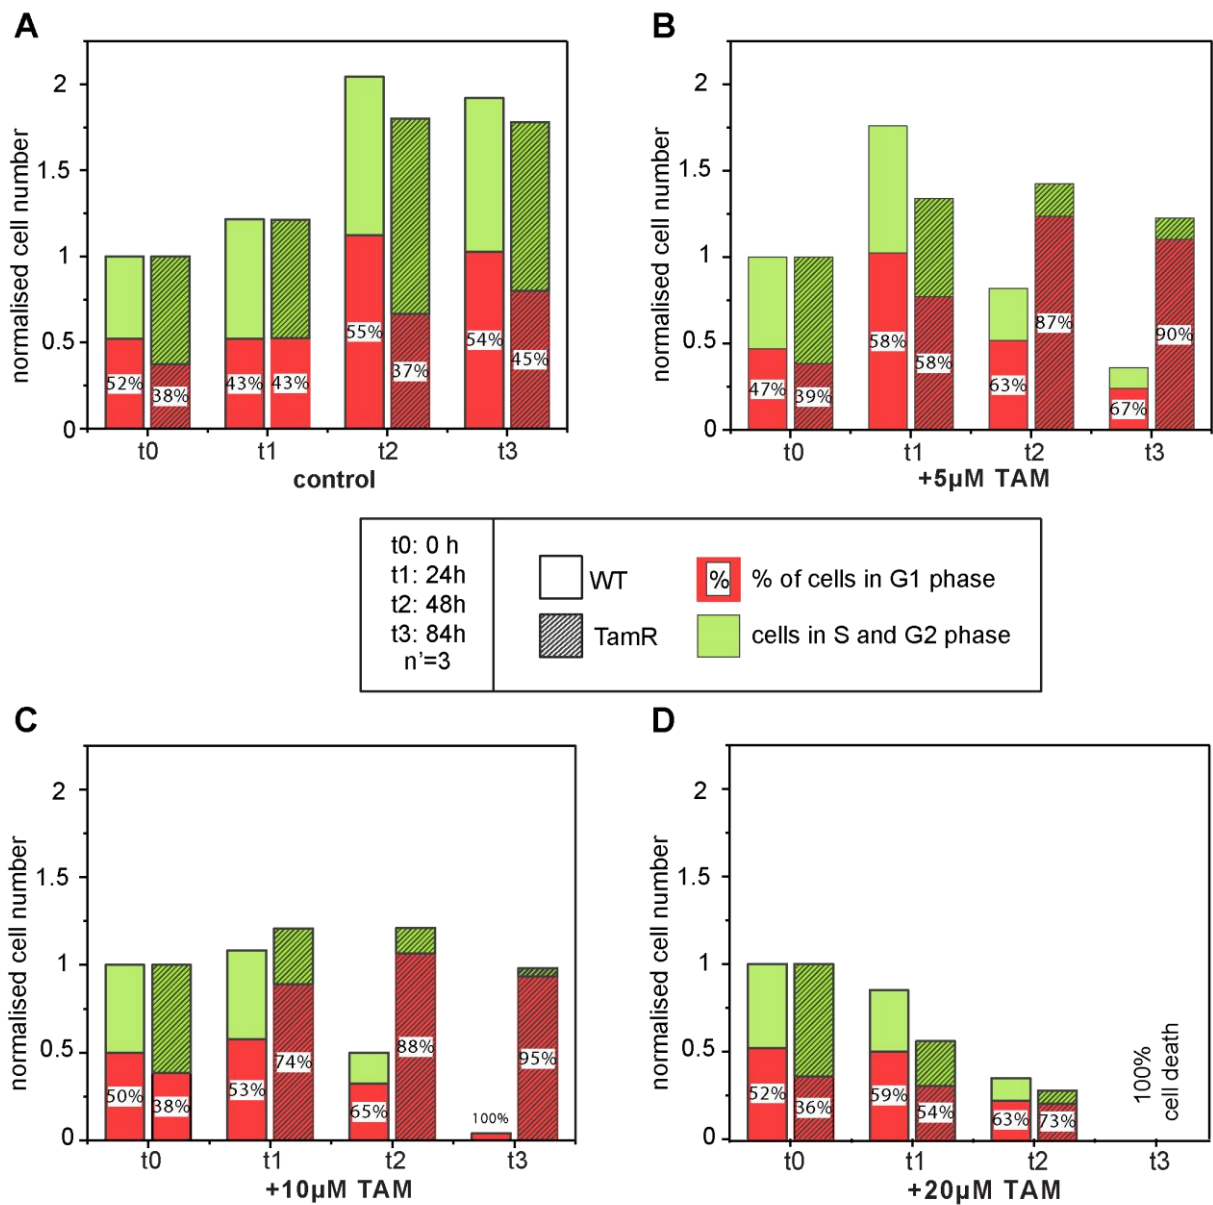

**Figure S9:** The effect of 4-hydroxytamoxifen on the cell cycle partition and viability for wild type and Tamoxifen-resistant MCF7 cells. Control (ethanol vehicle) (A), 5µM (B), 10 µM (C), and 20 µM (D) was added and monitored by live microscopy for a total duration of 84h.
